# Supplementary material for: Activation Spectra of Human Bitter Taste Receptors Stimulated with Cyclolinopeptides Corresponding to Fresh and Aged Linseed Oil
Source: PubMed Central journal article supplement — J Agric Food Chem. 2022 Apr 2;70(14):4382–90. doi: 10.1021/acs.jafc.2c00976 (PMC9011397; doi:10.1021/acs.jafc.2c00976), 2022-04-02
Supplement: jf2c00976_si_001.pdf [file jf2c00976_si_001.pdf]

## Supplementary information

### Supplementary table 1

Chromatographic and exact mass spectrometric characterization of isolated cyclolinopeptides used for compound identification

| Cyclolinopeptide | RT min | $m/z$ found ( $[[M+H]^+ / [M+Na]^+]$ ) | $m/z$ calculated ( $[[M+H]^+ / [M+Na]^+]$ ) | $\Delta$ mDa | Sum formula                                                                                                                                                      |
|------------------|--------|----------------------------------------|---------------------------------------------|--------------|------------------------------------------------------------------------------------------------------------------------------------------------------------------|
| CL1              | 13.767 | 1040.6544 / 1062.6355                  | 1040.6549 / 1062.6368                       | -0.5 / -0.7  | C <sub>57</sub> H <sub>86</sub> N <sub>9</sub> O <sub>9</sub> / C <sub>57</sub> H <sub>85</sub> N <sub>9</sub> O <sub>9</sub> Na                                 |
| 1-Met-CL2        | 13.488 | 1058.6108 / 1080.5927                  | 1058.6113 / 1080.5932                       | -0.5 / -0.5  | C <sub>56</sub> H <sub>84</sub> N <sub>9</sub> O <sub>9</sub> S / C <sub>56</sub> H <sub>83</sub> N <sub>9</sub> O <sub>9</sub> SNa                              |
| 1-Mso-CL2        | 12.658 | 1074.6063 / 1096.5879                  | 1074.6062 / 1096.5881                       | 0.1 / -0.2   | C <sub>56</sub> H <sub>84</sub> N <sub>9</sub> O <sub>10</sub> S / C <sub>56</sub> H <sub>83</sub> N <sub>9</sub> O <sub>10</sub> SNa                            |
| 1-Msn-CL2        | 12.865 | 1090.5998 / 1112.5823                  | 1090.6011 / 1112.5830                       | -0.5 / -0.7  | C <sub>56</sub> H <sub>84</sub> N <sub>9</sub> O <sub>11</sub> S / C <sub>56</sub> H <sub>83</sub> N <sub>9</sub> O <sub>11</sub> SNa                            |
| 1-Abu-CL3        | 13.817 | 1012.6234 / 1034.6052                  | 1012.6236 / 1034.6055                       | -0.2 / -0.3  | C <sub>55</sub> H <sub>82</sub> N <sub>9</sub> O <sub>9</sub> / C <sub>55</sub> H <sub>81</sub> N <sub>9</sub> O <sub>9</sub> Na                                 |
| 1-Met-CL3        | 13.886 | 1048.5680 / 1070.5509                  | 1048.5694 / 1070.5514                       | -1.4 / -0.5  | C <sub>57</sub> H <sub>78</sub> N <sub>9</sub> O <sub>8</sub> S / C <sub>57</sub> H <sub>77</sub> N <sub>9</sub> O <sub>8</sub> SNa                              |
| 1-Mso-CL3        | 13.481 | 1064.5647 / 1086.5461                  | 1064.5643 / -----                           | 0.4 / ----   | C <sub>57</sub> H <sub>78</sub> N <sub>9</sub> O <sub>9</sub> S / -----                                                                                          |
| 1-Met-CL4        | 13.680 | 961.5575 / 983.5388                    | 961.5585 / 983.5405                         | -1.0 / -1.7  | C <sub>51</sub> H <sub>77</sub> N <sub>8</sub> O <sub>8</sub> S / C <sub>51</sub> H <sub>76</sub> N <sub>8</sub> O <sub>8</sub> SNa                              |
| 1-Mso-CL4        | 12.792 | 977.5538 / 999.5355                    | 977.5534 / 999.5354                         | 0.4 / 0.1    | C <sub>51</sub> H <sub>77</sub> N <sub>8</sub> O <sub>9</sub> S / C <sub>51</sub> H <sub>76</sub> N <sub>8</sub> O <sub>9</sub> SNa                              |
| 1-Msn-CL4        | 13.174 | 993.5482 / 1015.5298                   | 993.5483 / 1015.5303                        | 0.1 / -0.5   | C <sub>51</sub> H <sub>77</sub> N <sub>8</sub> O <sub>10</sub> S / C <sub>51</sub> H <sub>76</sub> N <sub>8</sub> O <sub>10</sub> SNa                            |
| 1-Met,3-Met-CL5  | 13.981 | 1052.5114 / 1074.4926                  | 1052.5102 / 1074.4921                       | 1.2 / 0.5    | C <sub>55</sub> H <sub>74</sub> N <sub>9</sub> O <sub>8</sub> S <sub>2</sub> / C <sub>55</sub> H <sub>73</sub> N <sub>9</sub> O <sub>8</sub> S <sub>2</sub> Na   |
| 1-Met,3-Mso-CL5  | 13.270 | 1068.5060 / 1090.4869                  | 1068.5051 / 1090.4870                       | 0.9 / -0.1   | C <sub>55</sub> H <sub>74</sub> N <sub>9</sub> O <sub>9</sub> S <sub>2</sub> / C <sub>55</sub> H <sub>73</sub> N <sub>9</sub> O <sub>9</sub> S <sub>2</sub> Na   |
| 1-Mso,3-Mso-CL5  | 12.295 | 1084.4991 / 1106.4814                  | 1084.5000 / 1106.4820                       | -0.9 / -0.6  | C <sub>55</sub> H <sub>74</sub> N <sub>9</sub> O <sub>10</sub> S <sub>2</sub> / C <sub>55</sub> H <sub>73</sub> N <sub>9</sub> O <sub>10</sub> S <sub>2</sub> Na |
| 1-Met,3-Met-CL6  | 13.767 | 1066.5247 / 1088.5067                  | 1066.5258 / 1088.5078                       | -1.1 / -1.1  | C <sub>56</sub> H <sub>76</sub> N <sub>9</sub> O <sub>8</sub> S <sub>2</sub> / C <sub>51</sub> H <sub>76</sub> N <sub>8</sub> O <sub>8</sub> S <sub>2</sub> Na   |
| 1-Mso,3-Met-CL6  | 13.460 | 1082.5210 / 1104.5029                  | 1082.5207 / 1104.5027                       | 0.3 / 0.2    | C <sub>56</sub> H <sub>76</sub> N <sub>9</sub> O <sub>9</sub> S <sub>2</sub> / C <sub>51</sub> H <sub>76</sub> N <sub>8</sub> O <sub>9</sub> S <sub>2</sub> Na   |
| 1-Mso,3-Mso-CL6  | 12.544 | 1098.5151 / 1120.4972                  | 1098.5157 / 1120.4970                       | -0.6 / -0.4  | C <sub>56</sub> H <sub>76</sub> N <sub>9</sub> O <sub>10</sub> S <sub>2</sub> / C <sub>51</sub> H <sub>76</sub> N <sub>8</sub> O <sub>10</sub> S <sub>2</sub> Na |

### Supplementary table 2

LC-MS/MS properties of cyclolinopeptides in targeted quantification method. Retention time, mass transitions, linear range, R<sup>2</sup>, precision and accuracy values.

| Cyclolinopeptide             | Rt. (min) | Q1/Q3 ( $m/z$ ) <sup>a</sup>                   | Linear range ( $\mu$ M) |                     | R <sup>2</sup> | Precision RSD (%) <sup>b</sup> | accuracy (%) <sup>b</sup> |
|------------------------------|-----------|------------------------------------------------|-------------------------|---------------------|----------------|--------------------------------|---------------------------|
| CL1                          | 6.13      | 1040.62 → 120.2/70.2 <sup>c</sup> /245.2/217.2 | 0.09–5.6                | $y=1.11x-0.00048$   | 0.996          | 4.3–8.2                        | 88 – 101                  |
| 1-Met-CL2                    | 5.37      | 1058.53 → 120.1/70.1 <sup>c</sup> /217.2/245.2 | 0.08–5.4                | $y=1.07x-0.00609$   | 0.994          | 4.3–7.8                        | 96 – 105                  |
| 1-Mso-CL2                    | 2.11      | 1074.55 → 120.2/70.1 <sup>c</sup> /217.2/245.2 | 0.12–8.0                | $y=0.73x-0.0142$    | 0.995          | 1.8–11.6                       | 92 – 104                  |
| 1-Msn-CL2                    | 2.88      | 1090.55 → 120.2/70.1 <sup>c</sup> /217.0/245.1 | 0.6–16.0                | $y=0.713x-0.0558$   | 0.996          | 3.2–12.1                       | 85 – 104                  |
| 1-Met-CL3                    | 7.09      | 1048.55 → 245.2/217.2/70.1 <sup>c</sup> /120.1 | 0.05–3.1                | $y=0.0.689x+0.017$  | 0.994          | 2.3–17.3                       | 86 – 105                  |
| 1-Mso-CL3                    | 3.35      | 1064.66 → 217.2/245.2/70.2 <sup>c</sup> /120.2 | 0.09–5.6                | $y=0.102x-0.00031$  | 0.997          | 3.9–11.9                       | 90 – 104                  |
| 1-Met-CL4                    | 5.97      | 961.48 → 70.1 <sup>c</sup> /211.1/358.2/183.2  | 0.05–3.4                | $y=0.953x+0.00023$  | 0.996          | 2.1–8.8                        | 92 – 107                  |
| 1-Mso-CL4                    | 2.63      | 977.54 → 70.1 <sup>c</sup> /120.2/183.2/211.2  | 0.09–5.6                | $y=1.42x-0.00784$   | 0.996          | 2.2–11.1                       | 90 – 114                  |
| 1-Msn-CL4                    | 3.64      | 993.57 → 70.0 <sup>c</sup> /120.1/183.2/211.1  | 0.2–16.0                | $y=0.477x+0.00248$  | 0.995          | 1.4–10.8                       | 90 – 110                  |
| 1-Met,3-Met-CL5 <sup>d</sup> | 5.33      | 1052.57 → 336.2 <sup>c</sup> /352.3/70.0/189.2 |                         |                     |                |                                |                           |
| 1-Met,3-Mso-CL5 <sup>d</sup> | 3.18      | 1068.35 → 217.2 <sup>c</sup> /245.3/120.1/70.1 | 0.15–2.3                | $y=0.175x-0.066$    | 0.974          | 0.7–15.7                       | 97 – 103                  |
| 1-Mso,3-Mso-CL5 <sup>d</sup> | 1.43      | 1084.63 → 217.3/245.1/70.2 <sup>c</sup> /120.0 | 0.02–0.3                | $y=0.549x-0.0334$   | 0.965          | 6.7–13.9                       | 89 – 118                  |
| 1-Met,3-Met-CL6              | 6.66      | 1066.50 → 217.2/245.1/70.1 <sup>c</sup> /120.0 | 0.07–4.4                | $y=0.401x+0.000057$ | 0.992          | 2.0–19.0                       | 94 – 110                  |
| 1-Mso,3-Met-CL6              | 3.84      | 1082.65 → 245.2/217.2/70.1 <sup>c</sup> /120.2 | 0.1–6.6                 | $y=0.262x+0.00056$  | 0.995          | 2.0–19.1                       | 97 – 112                  |
| 1-Mso,3-Mso-CL6              | 1.63      | 1098.67 → 217.2/245.2/70.2 <sup>c</sup> /120.2 | 0.2–2.7                 | $y=0.478x+0.00725$  | 0.997          | 1.3–20.0                       | 98 – 108                  |
| IS: 1-Abu-CL2                | 4.35      | 1012.62 → 70.0 <sup>c</sup> /120.0/217.3/245.3 | -                       | -                   | -              | -                              | -                         |

<sup>a</sup> dwell time 15 msec. <sup>b</sup> linear range: <20% RSD. 80–120% accuracy. <sup>c</sup> Quantifier. <sup>d</sup> quantified using 1-Met-3-Met-CL6

### Supplementary table 3

Precision of the targeted LC-MS/MS method in authentic linseed oil sample.

| Cyclolinopeptide | Precision in linseed oil (% RSD) |      |
|------------------|----------------------------------|------|
|                  | Fresh                            | aged |
| CL1              | 7.4                              | 7.4  |
| 1-Met-CL2        | 5.2                              | -    |
| 1-Mso-CL2        | 2.9                              | 3.2  |
| 1-Msn-CL2        | 3.3                              | 5.8  |
| 1-Met-CL3        | 5.9                              | -    |
| 1-Mso-CL3        | 16.8                             | 8.1  |
| 1-Met-CL4        | 8.7                              | -    |
| 1-Mso-CL4        | 3.1                              | 5.0  |
| 1-Msn-CL4        | 3.4                              | 8.5  |

|                 |      |     |
|-----------------|------|-----|
| 1-Met,3-Met-CL5 | 8.0  | -   |
| 1-Met,3-Mso-CL5 | 13.0 | -   |
| 1-Mso,3-Mso-CL5 | 22.5 | -   |
| 1-Met,3-Met-CL6 | 3.8  | -   |
| 1-Mso,3-Met-CL6 | 10.2 | -   |
| 1-Mso,3-Mso-CL6 | 25.6 | 7.1 |

<sup>a</sup> n=3

#### Supplementary table 4

<sup>1</sup>H/ <sup>13</sup>C NMR shifts of 1-Met, 3-Met-CL6 (signal assignment was performed based on 2D H,H correlated experiment COSY, TOCSY and ROESY, 2D H,C correlated experiments HSQC and HMBC as well as a 2D H,N correlated experiment HSQC).

|                  | <sup>1</sup> H-NMR<br>(COSY, TOCSY, ROESY) |   |    | <sup>13</sup> C- NMR<br>(HSQC, HMBC) | <sup>1</sup> H-NMR<br>(COSY, TOCSY, ROESY) |                  |      | <sup>13</sup> C- NMR<br>(HSQC, HMBC) |    |         |        |
|------------------|--------------------------------------------|---|----|--------------------------------------|--------------------------------------------|------------------|------|--------------------------------------|----|---------|--------|
|                  | δ [ppm]                                    | I | M  |                                      | J [Hz]                                     | δ [ppm]          | I    |                                      | M  | J [Hz]  |        |
| Pro <sup>1</sup> |                                            |   |    |                                      | Ile <sup>5</sup>                           |                  |      |                                      |    |         |        |
| α                | 4.16                                       | 1 | t  | 7.8                                  | 62.6                                       | α                | 4.27 | 1                                    | m  | 58.3    |        |
| β                | 1.96                                       | 1 | m  |                                      | 29.4                                       | β                | 1.80 | 1                                    | m  | 37.3    |        |
|                  | 1.67                                       | 1 | m  |                                      |                                            | γ                | 1.40 | 1                                    | m  | 25.1    |        |
| γ                | 1.93                                       | 1 | m  |                                      | 25.1                                       |                  | 1.12 | 1                                    | m  |         |        |
| δ                | 3.63                                       | 1 | m  |                                      | 47.6                                       | γ <sub>CH3</sub> | 0.87 | 3                                    | d  | 7.6     | 15.9   |
|                  | 3.57                                       | 1 | m  |                                      |                                            | δ <sub>CH3</sub> | 0.85 | 3                                    | m  |         | 11.8   |
| C=O              |                                            |   |    |                                      | 173.7                                      | NH               | 7.58 | 1                                    | bs |         |        |
|                  |                                            |   |    |                                      |                                            | C=O              |      |                                      |    |         | 172.21 |
| Phe <sup>2</sup> |                                            |   |    |                                      |                                            | Met <sup>6</sup> |      |                                      |    |         |        |
| α                | 4.10                                       | 1 | m  |                                      | 56.8                                       | α                | 4.09 | 1                                    | m  |         | 53.9   |
| β                | 2.98                                       | 1 | dd | 14.0/10.1                            | 35.8                                       | β                | 2.06 | 1                                    | m  |         | 30.2   |
|                  | 2.88                                       | 1 | dd | 14.0/4.8                             |                                            |                  | 1.84 | 1                                    | m  |         |        |
| γ                |                                            |   |    |                                      | 138.6                                      |                  | 2.36 | 2                                    | m  |         | 30.6   |
| δ                | 7.24                                       | 1 | m  |                                      | 129.1                                      | γ                | 2.00 | 3                                    | s  |         | 15.0   |
| ε                | 7.23-7.29                                  |   | m  |                                      | 128.6                                      | ε <sub>CH3</sub> | 7.94 | 1                                    | bs |         |        |
| ζ                | 7.16-7.23                                  |   | m  |                                      | 126.7                                      | NH               |      |                                      |    |         |        |
| NH               | 8.23                                       | 1 | d  | 6.4                                  |                                            | C=O              |      |                                      |    |         | 171.9  |
| C=O              |                                            |   |    |                                      | 170.8                                      |                  |      |                                      |    |         |        |
|                  |                                            |   |    |                                      |                                            | Leu <sup>7</sup> |      |                                      |    |         |        |
| Phe <sup>3</sup> |                                            |   |    |                                      |                                            | α                | 3.72 | 1                                    | m  |         | 53.4   |
| α                | 4.60                                       | 1 | m  |                                      | 54.1                                       | β                | 1.88 | 1                                    | m  |         | 38.1   |
| β                | 3.29                                       | 1 | m  |                                      | 37.0                                       |                  | 1.60 | 1                                    | m  |         |        |
|                  | 2.76                                       | 1 | m  |                                      |                                            | γ                | 1.55 | 1                                    | m  |         | 25.0   |
| γ                |                                            |   |    |                                      | 138.8                                      | δ <sub>CH3</sub> | 0.87 | 3                                    | d  | 6.4     | 23.5   |
| δ                | 7.00                                       | 1 | d  | 7.4                                  | 129.2                                      |                  | 0.82 | 3                                    | d  | 6.4     | 21.5   |
| ε                | 7.23-7.29                                  | 1 | m  |                                      | 128.6                                      | NH               | 8.05 | 1                                    | d  | 6.8     |        |
| ζ                | 7.16-7.23                                  | 1 | m  |                                      | 126.7                                      | C=O              |      |                                      |    |         | 171.7  |
| NH               | 7.87                                       | 1 | d  | 8.6                                  |                                            | Met <sup>8</sup> |      |                                      |    |         |        |
| C=O              |                                            |   |    |                                      | 171.6                                      | α                | 4.79 | 1                                    | dt | 9.2/3.7 | 50.2   |
|                  |                                            |   |    |                                      |                                            | β                | 2.08 | 1                                    | m  |         | 32.3   |
| Trp <sup>4</sup> |                                            |   |    |                                      |                                            |                  | 1.86 | 1                                    | m  |         |        |
| α                | 4.17                                       | 1 | m  |                                      | 56.5                                       | γ                | 2.48 | 2                                    | m  |         | 30.3   |
| β                | 3.29                                       | 2 | m  |                                      | 25.0                                       | ε <sub>CH3</sub> | 2.02 | 3                                    | s  |         | 15.5   |
| <sup>1</sup> NH  | 10.57                                      | 1 | s  |                                      |                                            | NH               | 7.34 | 1                                    | bs |         |        |
| 2                | 7.23                                       | 1 | s  |                                      | 123.5                                      | C=O              |      |                                      |    |         | 171.4  |
| 3                |                                            |   |    |                                      | 110.9                                      |                  |      |                                      |    |         |        |
| 4                | 7.44                                       | 1 | d  | 7.9                                  | 118.3                                      |                  |      |                                      |    |         |        |
| 5                | 6.95                                       | 1 | t  | 7.9                                  | 118.7                                      |                  |      |                                      |    |         |        |
| 6                | 7.04                                       | 1 | t  | 7.9                                  | 121.3                                      |                  |      |                                      |    |         |        |
| 7                | 7.32                                       | 1 | d  | 7.9                                  | 111.8                                      |                  |      |                                      |    |         |        |
| 8                |                                            |   |    |                                      | 136.5                                      |                  |      |                                      |    |         |        |
| 9                |                                            |   |    |                                      | 127.9                                      |                  |      |                                      |    |         |        |
| NH               | 8.33                                       | 1 | bs |                                      |                                            |                  |      |                                      |    |         |        |
| C=O              |                                            |   |    |                                      | 172.8                                      |                  |      |                                      |    |         |        |
